# Supplementary material for: Synthesis of hierarchical rippled Bi2O3 nanobelts for supercapacitor applications
Source: Royal Society of Chemistry journal article supplement (doi:10.1039/c002126a), 2010-01-01
Supplement: c002126a.pdf [file c002126a.pdf]

## Supporting Information

# Synthesis of Hierarchical Rippled Bi<sub>2</sub>O<sub>3</sub> Nanobelts for Supercapacitor Applications

Fu-Lin Zheng, Gao-Ren Li,\* Yan-Nan Ou, Zi-Long Wang, Cheng-Yong Su, Ye-Xiang Tong\*

*MOE of Key Laboratory of Bioinorganic and Synthetic Chemistry / School of Chemistry and Chemical Engineering / Institute of Optoelectronic and Functional Composite Materials / Sun Yat-Sen University, Guangzhou 510275, China*

**Email:** [ligaoren@mail.sysu.edu.cn](mailto:ligaoren@mail.sysu.edu.cn); [chedhx@mail.sysu.edu.cn](mailto:chedhx@mail.sysu.edu.cn)

### Experimental section

**Synthesis:** All chemical reagents were analar (AR) grade. The hierarchical rippled Bi<sub>2</sub>O<sub>3</sub> nanobelts were electrodeposited in solution of 0.005 M Bi(NO<sub>3</sub>)<sub>3</sub>+0.05 M Na<sub>2</sub>EDTA+0.1 M sucrose with current density of 4.0 mA/cm<sup>2</sup> for 60 min. The Ti plates (99.99%, 1.5 cm<sup>2</sup>) were used as the substrate for electrodeposition, and they are prepared complying the following steps before each experiment: firstly polished by SiC abrasive paper from 300 to 800 grits, then dipped in HCl solution (5%) for 5 min and rinsed with acetone in ultrasonic bath for 5 min, and finally washed by distilled water. A simple three-electrode cell was used in our experiments. The graphite electrode was used as a counter electrode (spectral grade, 1.8 cm<sup>2</sup>). The saturated calomel electrode (SCE)

was used as the reference electrode that was connected to the cell with a double salt bridge system. All potential values determined in this study were the values vs SCE. The electrodeposition experiments were carried out at room temperature by galvanostatic electrolysis.

**Characterizations:** The deposits were analyzed by X-ray diffraction (XRD, PIGAKU, D/MAX 2200 VPC) to determine the film structures. The surface morphologies of the deposited products were observed by thermal field emission environment scanning electron microscope (TFE-SEM, FEI, Quanta 400), transmission electron microscope (TEM, JEM- 2010HR), and high-resolution TEM (200 kV). The surface area was calculated using the Brunauer-Emmett-Teller (BET) equation. Poresize distributions were calculated by the Barrett-Joyner-Halenda (BJH) method.

**Electrochemical measurements:** All electrochemical measurements were carried out in a three-electrode experimental setup. The obtained  $\text{Bi}_2\text{O}_3$  thin films with thickness of about  $0.356 \mu\text{m}$  on Ti substrate was used as the working electrode. Platinum foil with the same area as the working electrode and a saturated calomel electrode (SCE) were used as the counter and reference electrodes, respectively. All the electrochemical measurements were carried out in  $1.0 \text{ M Na}_2\text{SO}_4$  aqueous electrolyte by using a CHI 750A electrochemical workstation (CHI Instruments).

## XRD pattern

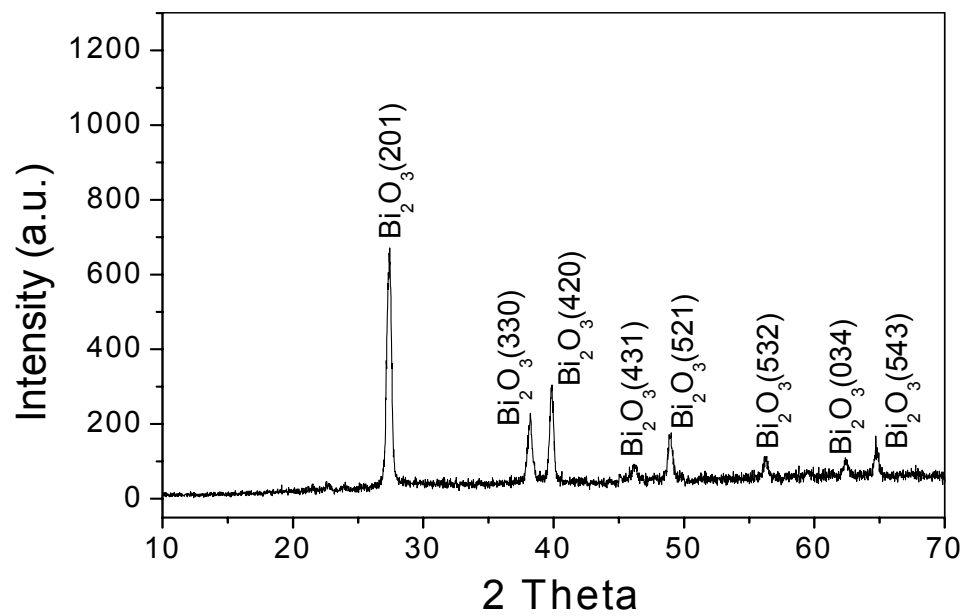

**Figure S1.** XRD pattern of hierarchical rippled Bi<sub>2</sub>O<sub>3</sub> nanobelts.

## EDS pattern

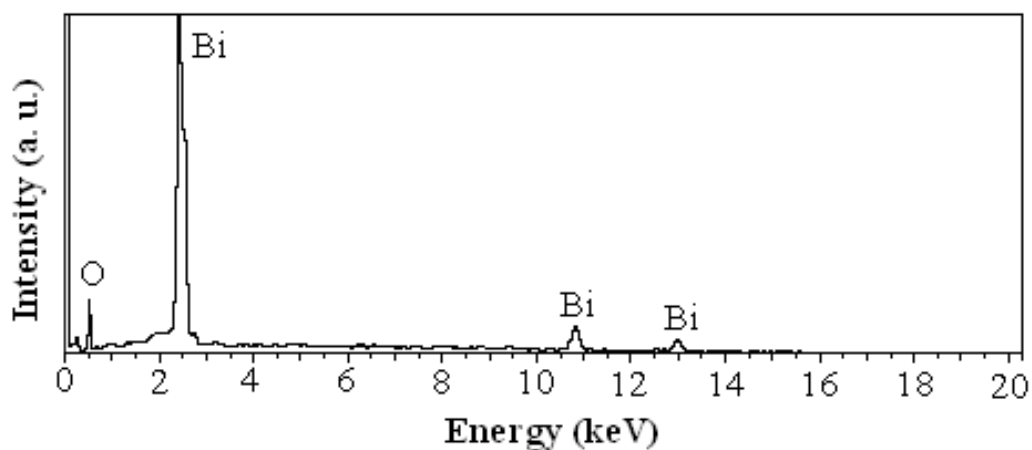

**Figure S2.** EDS pattern of with hierarchical rippled  $\text{Bi}_2\text{O}_3$  nanobelts prepared in solution of 0.1 M sucrose+0.005 M  $\text{Bi}(\text{NO}_3)_3$ +0.05 M  $\text{Na}_2\text{EDTA}$  with current density of  $4.0 \text{ mA/cm}^2$ .

A typical EDS spectrum was shown in Figure S2, and the compositional analysis shows the stoichiometry Bi/O in the deposits is about 2/3, which proves that the nanobelt consists of pure  $\text{Bi}_2\text{O}_3$ .

## SEM images of various $\text{Bi}_2\text{O}_3$ nanobelts electrodeposited with different current densities

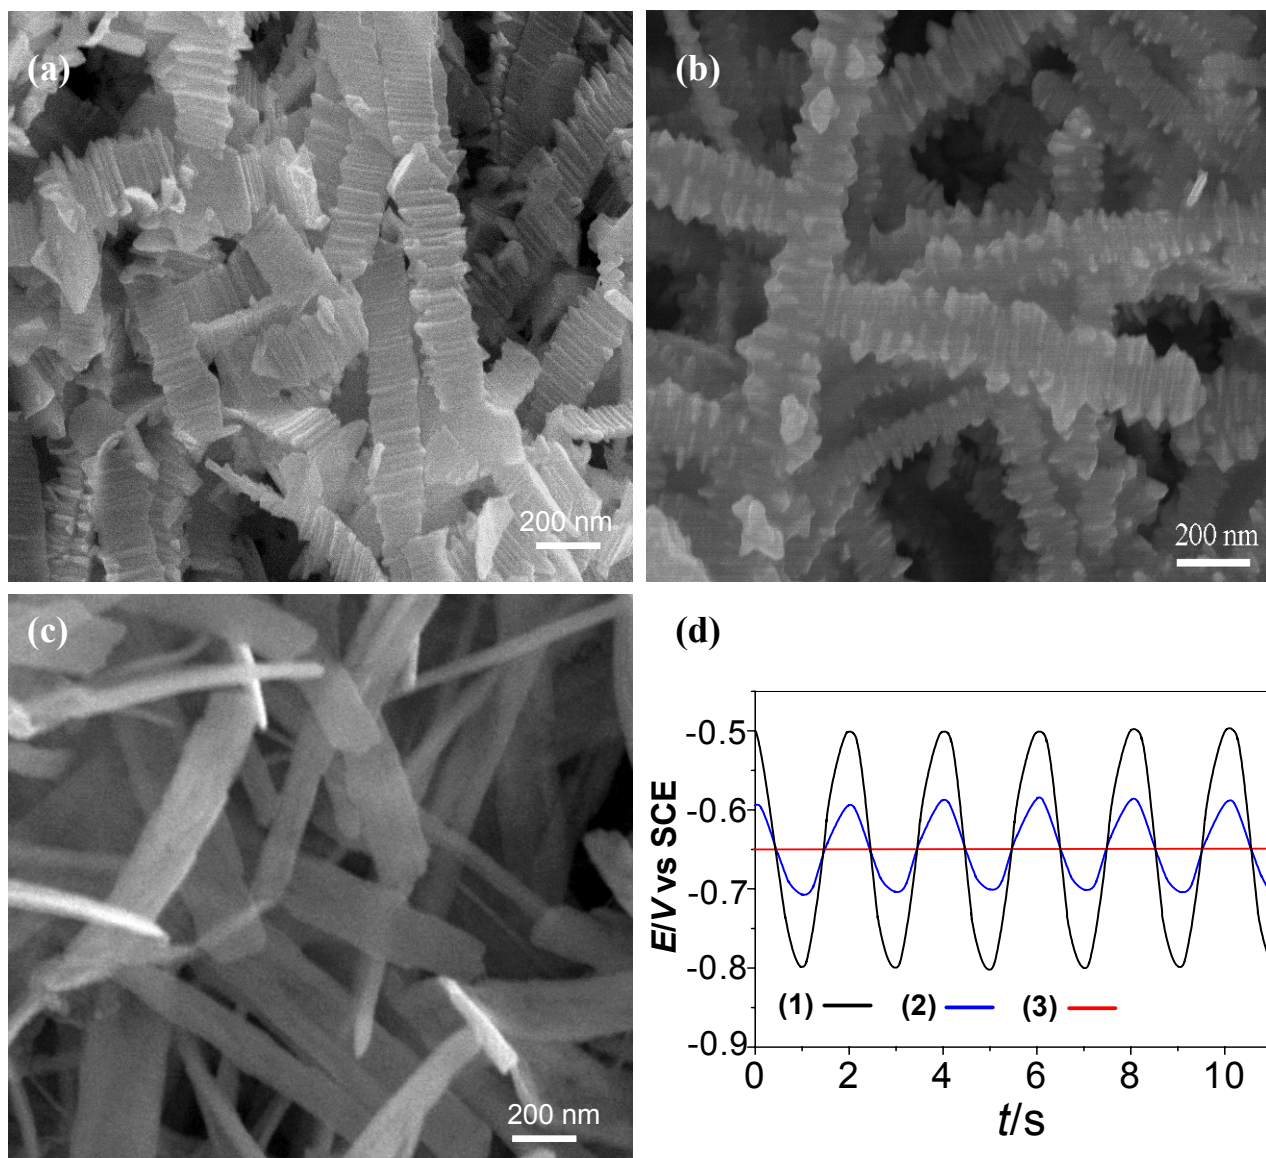

**Figure S3.** SEM images of various  $\text{Bi}_2\text{O}_3$  nanobelts prepared in solution of 0.1 M sucrose+0.005 M  $\text{Bi}(\text{NO}_3)_3$ +0.05 M  $\text{Na}_2\text{EDTA}$  with current density of (a) 4.0 mA/cm<sup>2</sup>; (b) 2.0 mA/cm<sup>2</sup>; and (c) 1.0 mA/cm<sup>2</sup>. (d) The electrode potential oscillations at current density of (1) 4.0 mA/cm<sup>2</sup> (strong); (2) 2.0 mA/cm<sup>2</sup> (weak); and (3) 1.0 mA/cm<sup>2</sup> (no oscillation).

## XPS spectra

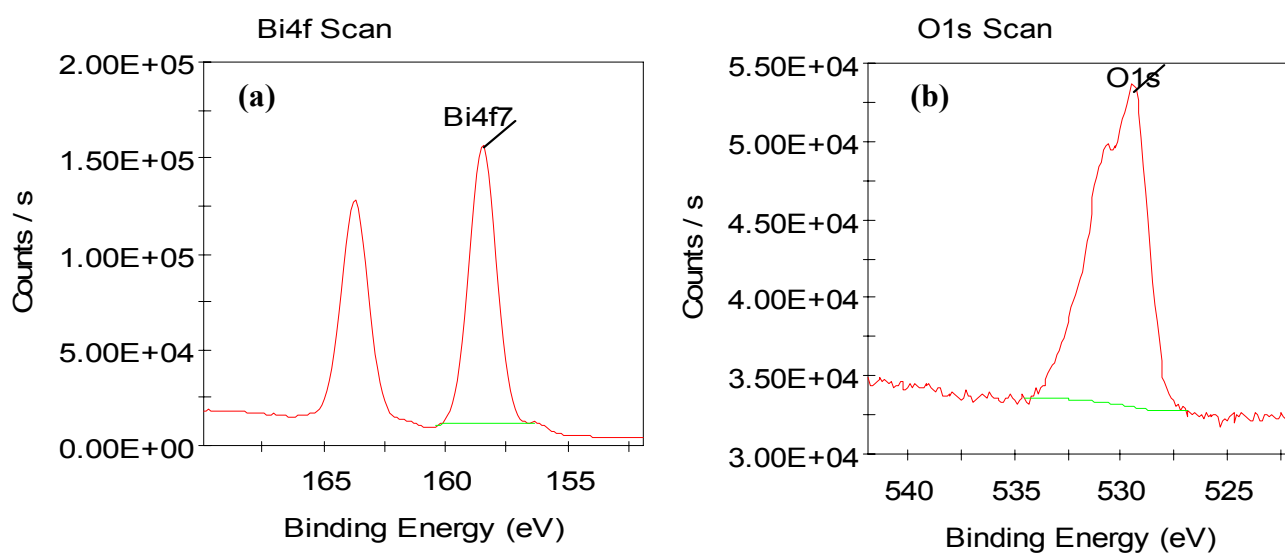

**Figure S4.** XPS spectra of (a) Overall , (b) Bi4f , and (c) O1s of the hierarchical rippled  $\text{Bi}_2\text{O}_3$  nanobelts.

## **The illustration of the roles of Na<sub>2</sub>EDTA and sucrose in the formation of Bi<sub>2</sub>O<sub>3</sub> nanobelts with hierarchical rippled structures**

In our experiment, when only Na<sub>2</sub>EDTA was added into deposition solution, the prepared Bi<sub>2</sub>O<sub>3</sub> products were consisted of hexagonal plates. Figure S5(a) shows the SEM and TEM images of Bi<sub>2</sub>O<sub>3</sub> deposits prepared in solution of 0.005 M Bi(NO<sub>3</sub>)<sub>3</sub>+0.05 M Na<sub>2</sub>EDTA with current density of 4.0 mA/cm<sup>2</sup>, and it can be clearly observed Bi<sub>2</sub>O<sub>3</sub> hexagons were prepared. The edges of the Bi<sub>2</sub>O<sub>3</sub> hexagons are about 1.0 μm and thicknesses are approximately 200 nm. The HRTEM image shown in Figure S5(b) and the SAED pattern in the inset both showed that the deposited Bi<sub>2</sub>O<sub>3</sub> hexagons were polycrystalline. However, the Bi<sub>2</sub>O<sub>3</sub> nanobelts with hierarchical rippled surfaces can be successfully prepared when the sucrose was also added into deposition solution as shown in Figure S3(a) and (b). Therefore, it is reasonable to indicate that the growth of Bi<sub>2</sub>O<sub>3</sub> nanobelts can be attributed to specific interactions between Bi<sub>2</sub>O<sub>3</sub> nuclei and the sucrose. In the synthesis of nanomaterials, it is well known that some capping molecules can block the crystal growth of certain directions and enhance the crystal growth of other directions.<sup>1-2</sup> Herein, we believe that the capping effect of the sucrose plays a key role for the growth of Bi<sub>2</sub>O<sub>3</sub> nanobelts with hierarchical rippled surfaces.

### **References**

- (1) Epifani, M.; Arbiol, J.; Diaz, R.; Peralvarez, M. J.; Siciliano, P.; Morante, J. R. *Chem. Mater.* **2005**, *17*, 6468-6472.
- (2) Shevchenko, E. V.; Talapin, D. V.; Rogach, A. L.; Kornowski, A.; Haase, M.; Weller, H. *J. Am. Chem. Soc.* **2002**, *124*, 11480-11485.

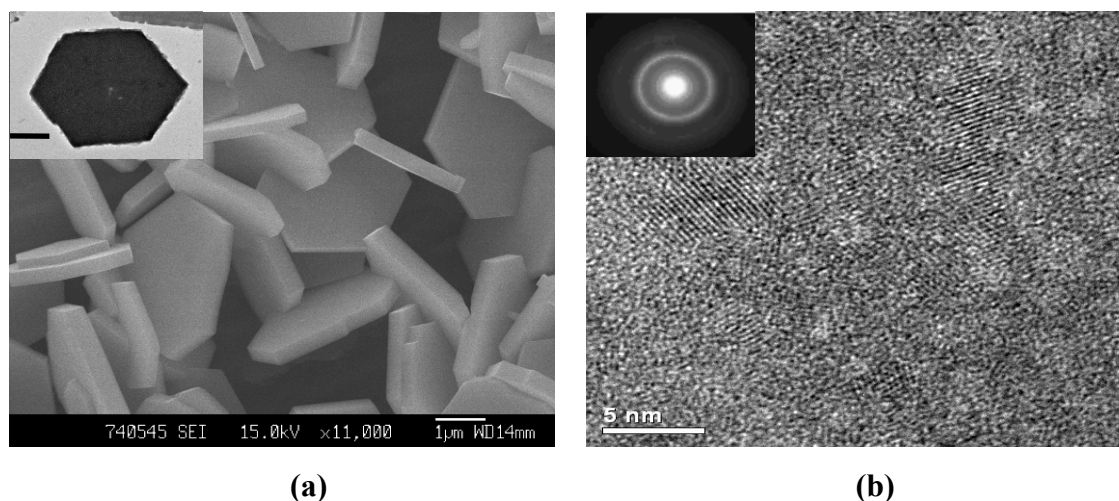

**Figure S5.** (a) SEM image and TEM (inset) of  $\text{Bi}_2\text{O}_3$  hexagons prepared in solution of 0.005 M  $\text{Bi}(\text{NO}_3)_3$ +0.05 M  $\text{Na}_2\text{EDTA}$  with current density of  $4.0 \text{ mA/cm}^2$  with different magnifications; (b) HRTEM image and SAED (inset). (The scan bar in TEM is 500 nm)

### The charge/discharge curves of the rippled $\text{Bi}_2\text{O}_3$ nanobelts electrode with different current densities

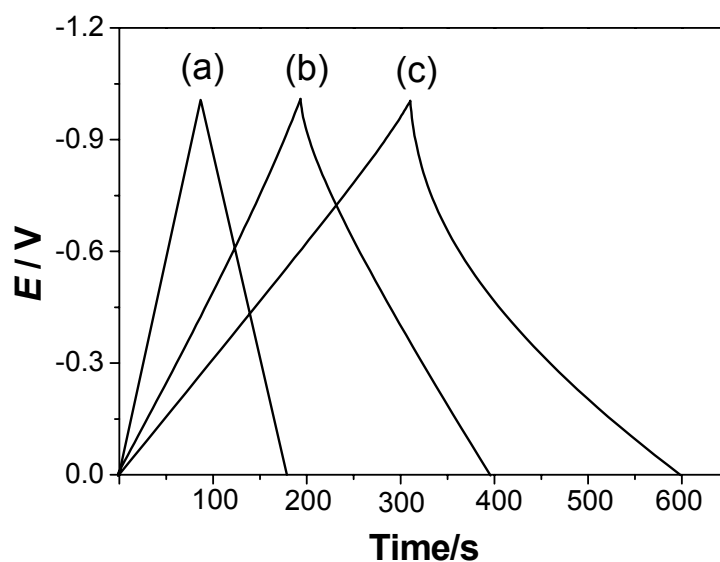

**Figure S6.** The charge/discharge curves of the rippled  $\text{Bi}_2\text{O}_3$  nanobelt electrode in 1.0 M  $\text{Na}_2\text{SO}_4$ : (a)  $2.0 \text{ mA/cm}^2$ ; (b)  $1.5 \text{ mA/cm}^2$ ; (c)  $1.0 \text{ mA/cm}^2$ .



### **Calculation method for the specific capacitance ( $C_{sp}$ ):**

The specific capacitance ( $C_{sp}$ ) is calculated by dividing the capacitance by the weight of  $\text{Bi}_2\text{O}_3$  nanobelt electrode, namely:

$$C_{sp} = i/vw \quad (1)$$

Where  $i$ ,  $v$ , and  $w$  are the average current (mA), the scan rate (mV/s), and the weight (g) of deposited  $\text{Bi}_2\text{O}_3$ , respectively.
